# Supplementary material for: Innovative electrochemical electrode modified with Al2O3 nanoparticle decorated MWCNTs for ultra-trace determination of tamsulosin and solifenacin in human plasma and urine samples and their pharmaceutical dosage form
Source: RSC Adv. 2022 Jun 13;12(27):17536–49. doi: 10.1039/d2ra01962k (PMC9192163; doi:10.1039/d2ra01962k)

**Figure S1:** (A) Chronoamperograms of TAM at  $\text{Al}_2\text{O}_3\text{-NPs/MWCNTs/CPE}$  in BR buffer (0.04 M) pH 4.0, containing: 10, 50, 70 and 100 ng/ml TAM. (B) The plot of  $i$  ( $\mu\text{A}$ ) against  $t^{-1/2}$  ( $\text{S}^{-1/2}$ ) for different concentrations of TAM. (C) The plot of the resulted slopes in (B) against the concentrations of TAM.

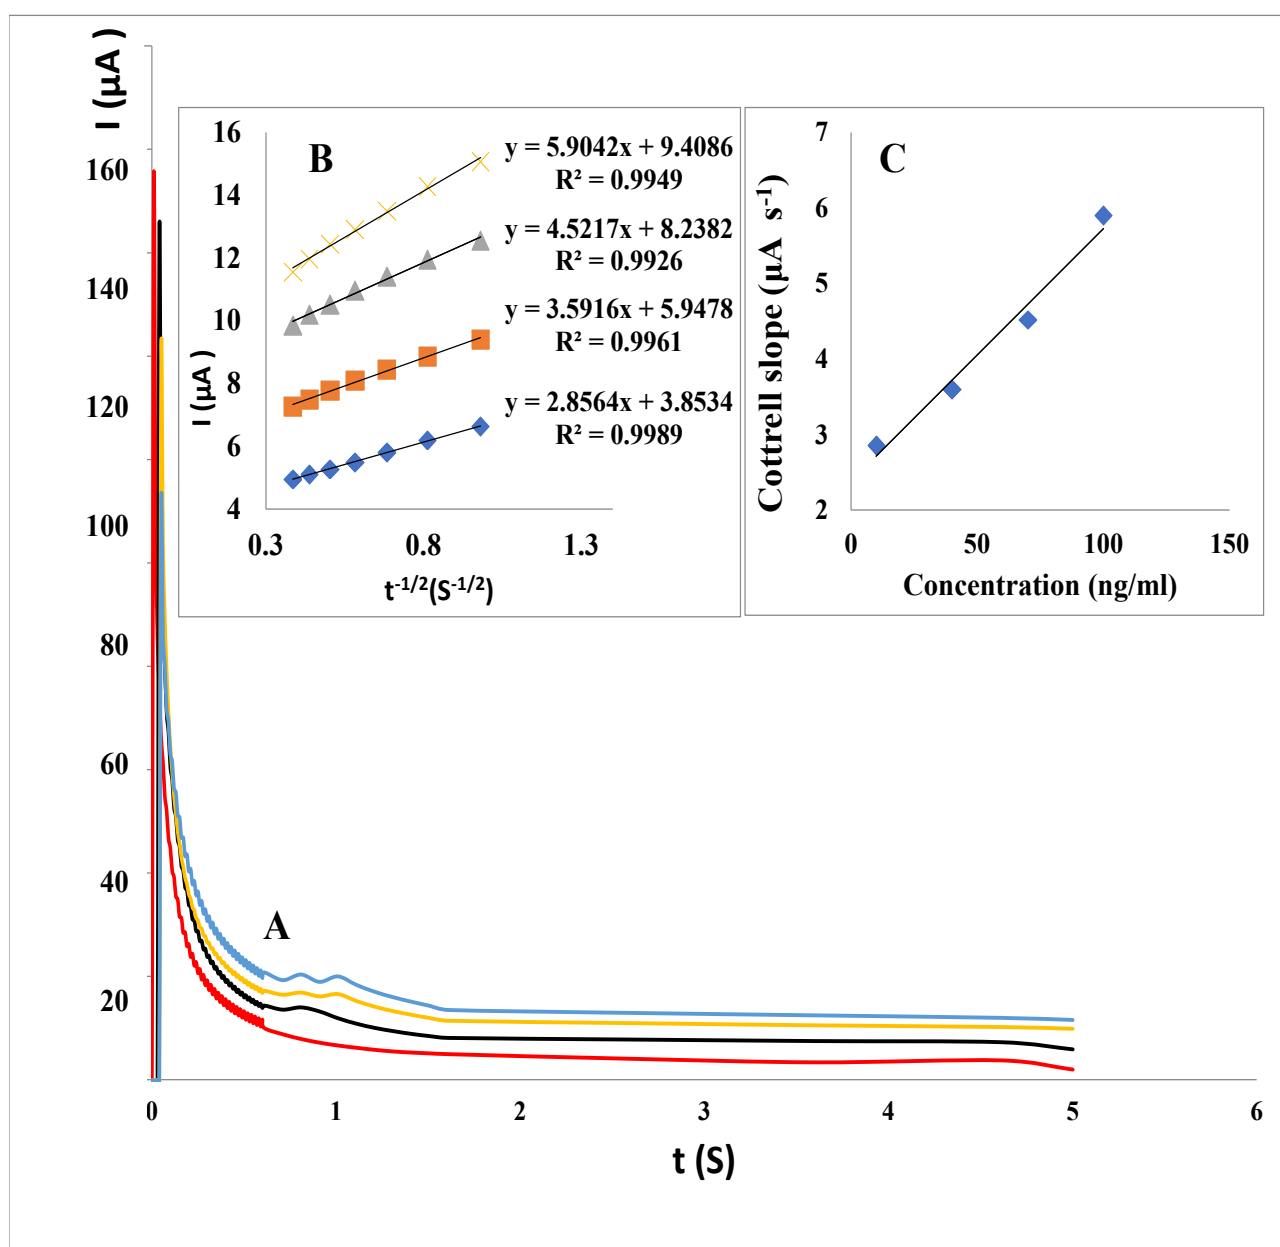

**Figure S2:** (A) Chronoamperograms of SOL at Al<sub>2</sub>O<sub>3</sub>-NPs/MWCNTs/CPE in BR buffer (0.04 M) pH 4.0, containing: 10, 70, 50 and 125 ng/ml SOL. (B) The plot of  $I$  ( $\mu$ A) against  $t^{-1/2}$  ( $S^{-1/2}$ ) for different concentrations of SOL. (C) The plot of the resulted slopes in (B) against the concentrations of SOL.

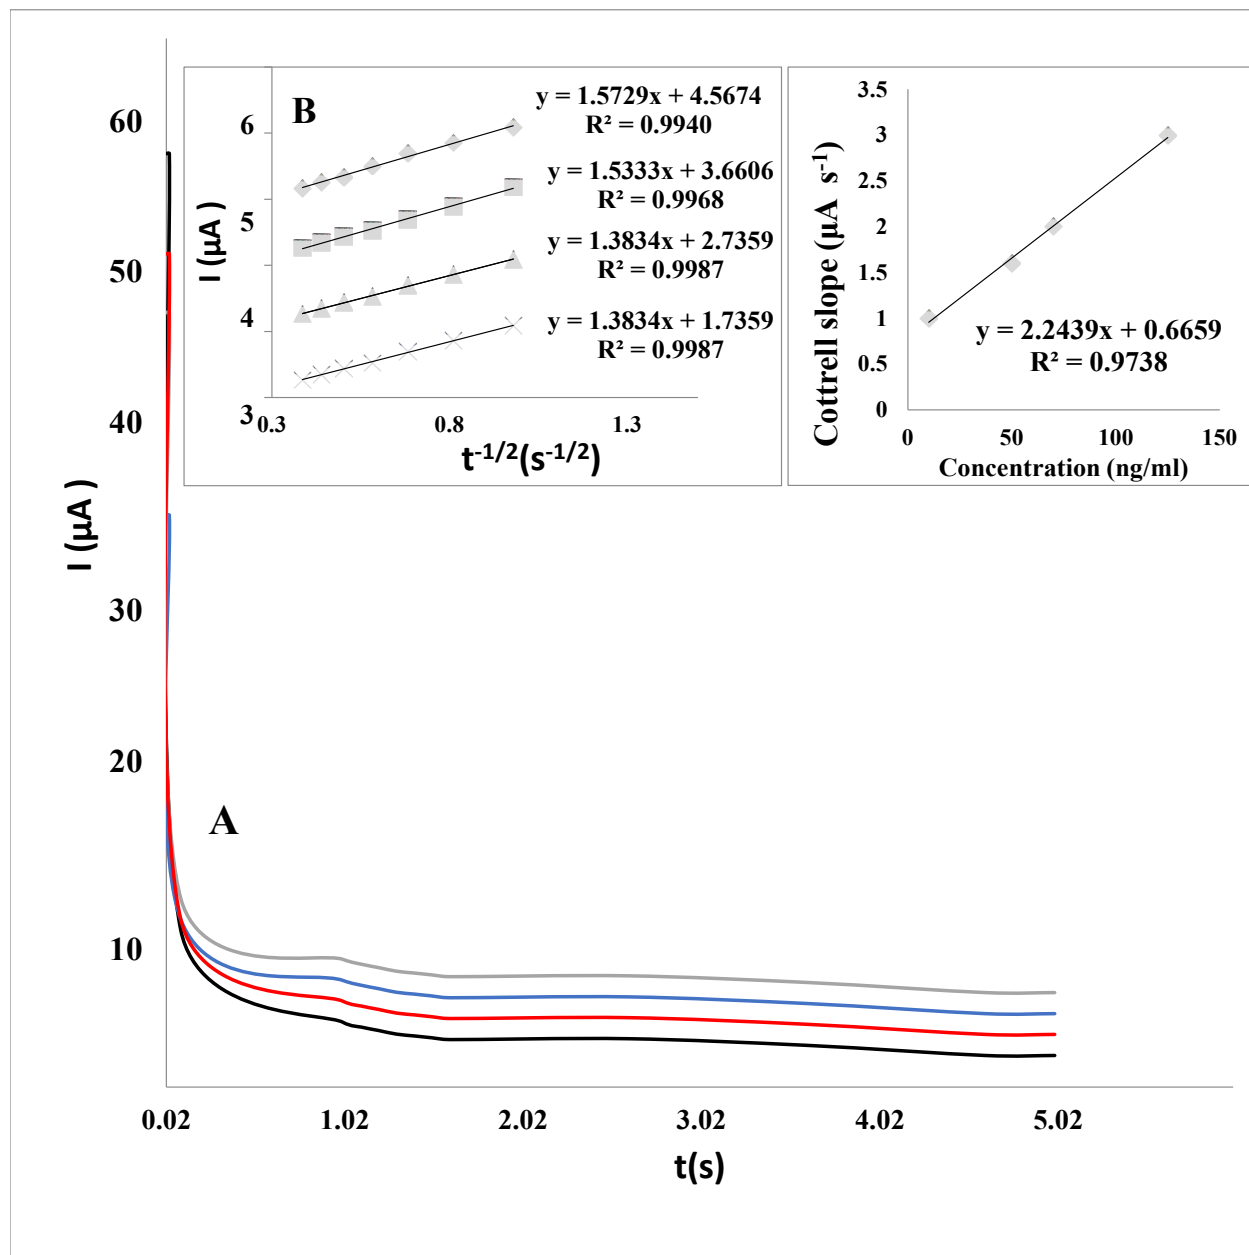

**Figure S3:** Reproducibility of Al<sub>2</sub>O<sub>3</sub>-NPs/MWCNTs/CPE in BR buffer pH 4.0, containing 100 ng/ml TAM (A) and 125 ng/ml SOL(B)

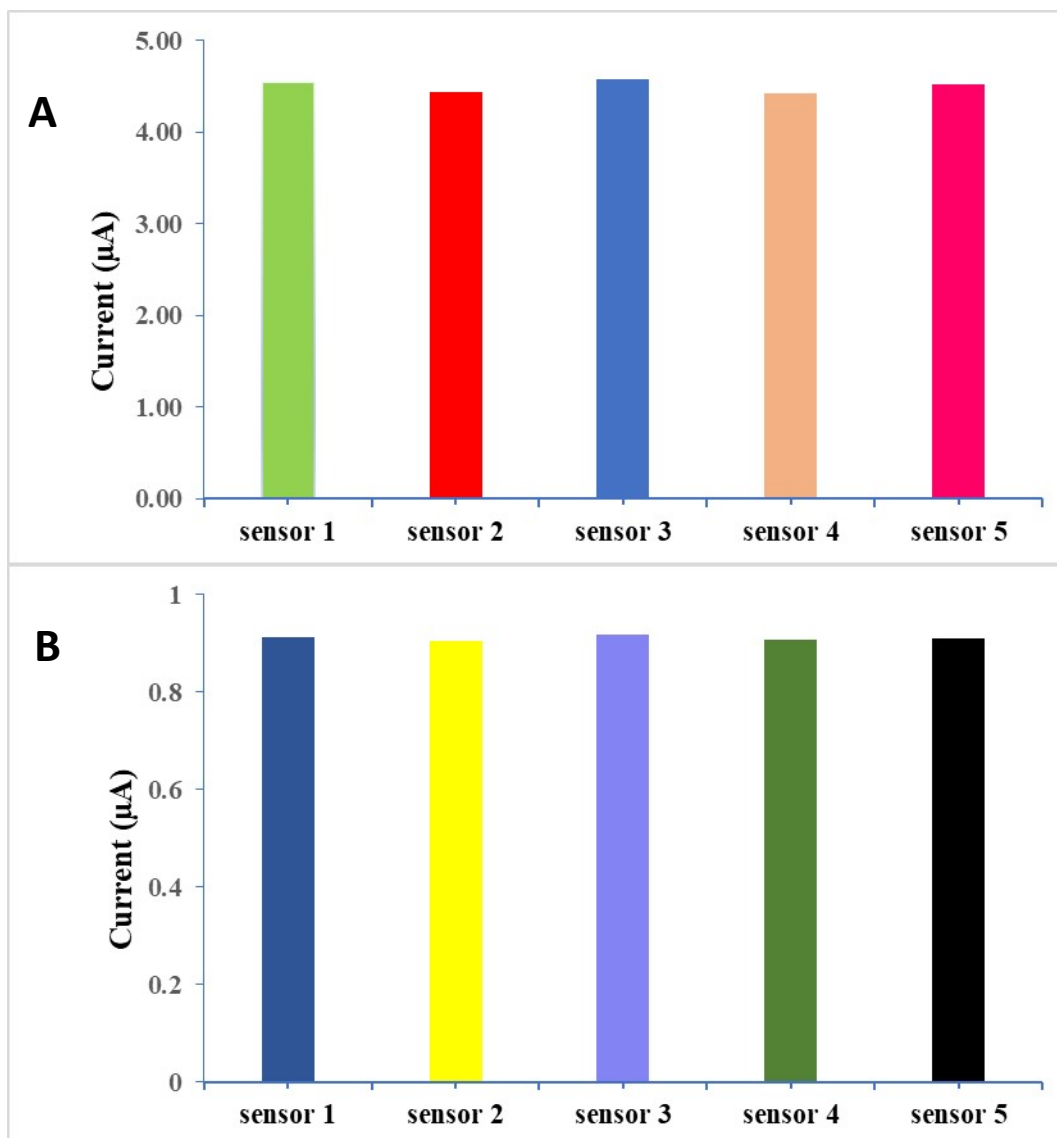

**Figure S4:** Stability of Al<sub>2</sub>O<sub>3</sub>-NPs/MWCNTs/CPE in BR buffer pH 4.0, containing 100 ng/ml TAM (A) and 125 ng/ml SOL(B)

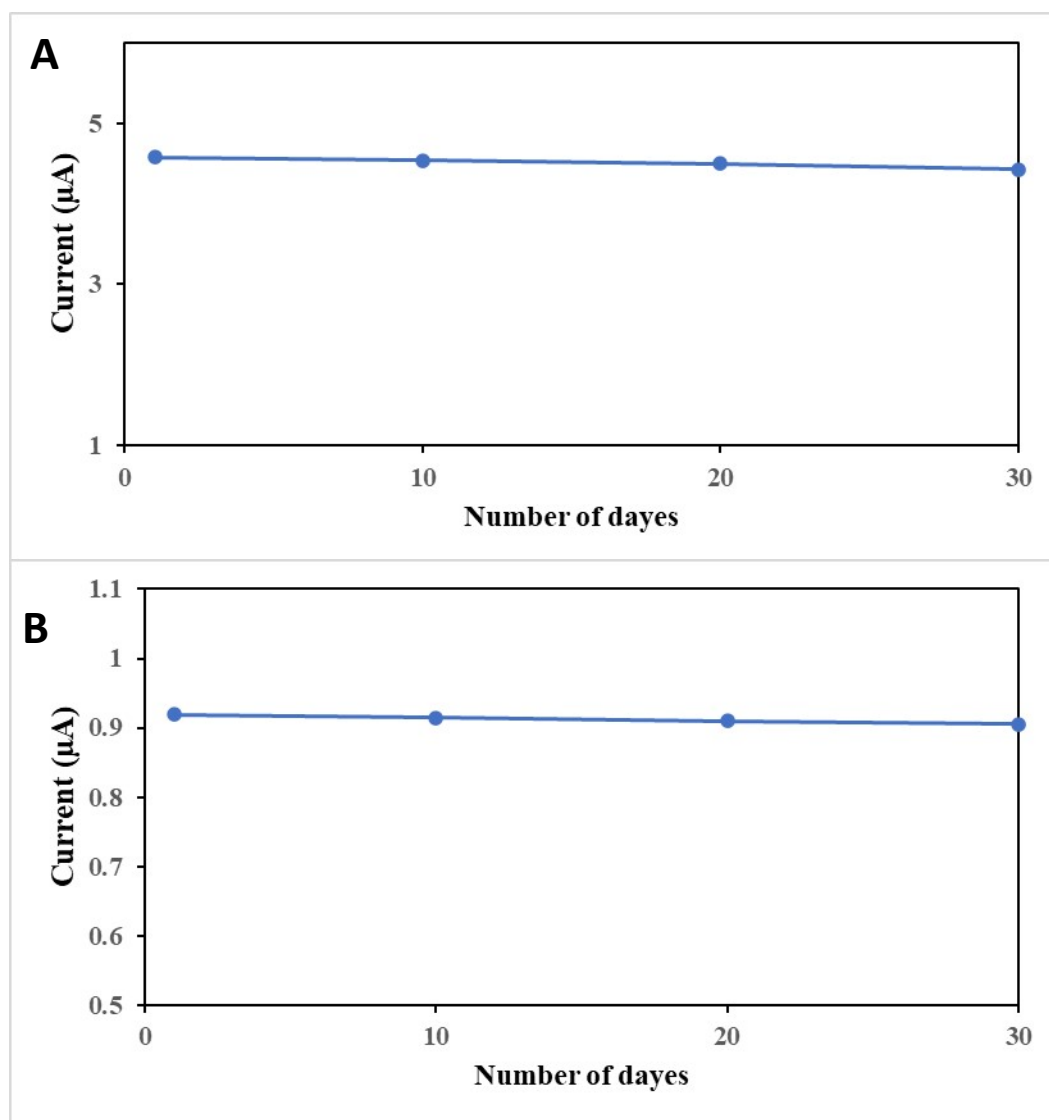

**Figure S5:** Square wave voltammogram for TAM and SOL at Al<sub>2</sub>O<sub>3</sub>-NPs/MWCNTs/CPE in BR buffer (0.04 M) pH 4.0 and scan rate of 100 mV/s.

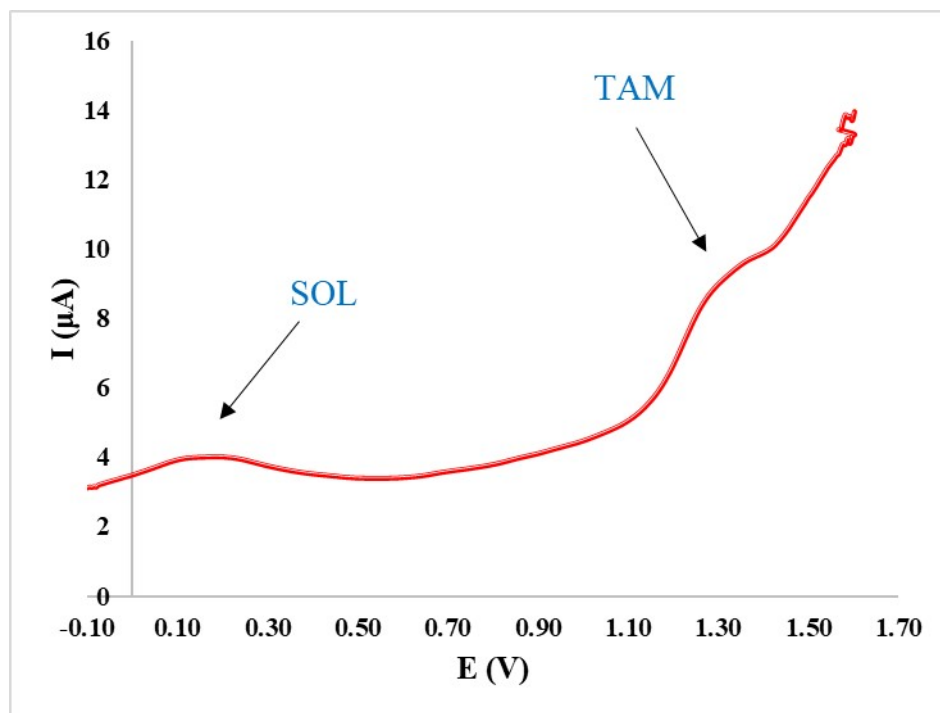

Supplement: RA-012-D2RA01962K-s001 [file RA-012-D2RA01962K-s001.pdf]
